# Supplementary material
Source: PubMed Central journal article supplement (PMC8983605)
Supplement: mmc1.pdf [file mmc1.pdf]

Supplementary Materials S1

a) Creativity→Positive Affect

|                     | St.Coeff. | se  | t     | p    | LLCI  | ULCI |
|---------------------|-----------|-----|-------|------|-------|------|
| Creativity          | .50       | .57 | 7.98  | .000 | 3.42  | 5.66 |
| Extraversion        | .18       | .29 | 3.22  | .001 | .36   | 1.48 |
| Agreeableness       | -.01      | .37 | -1.10 | .921 | -.76  | .69  |
| Conscientiousness   | .10       | .33 | 1.83  | .069 | -.05  | 1.27 |
| Emotional stability | .08       | .31 | 1.40  | .164 | -.18  | 1.05 |
| Openness            | -.02      | .34 | -.30  | .768 | -.76  | .57  |
| Age                 | -.04      | .03 | -8.83 | .406 | -.07  | .03  |
| Sex                 | -.04      | .75 | -.66  | .510 | -1.97 | .98  |

b) Creativity→Stress

|                   | St.Coeff. | se  | t     | p    | LLCI  | ULCI  |
|-------------------|-----------|-----|-------|------|-------|-------|
| Creativity        | .02       | .38 | .29   | .776 | -.65  | .87   |
| Positive affect   | -.21      | .04 | -3.28 | .001 | -.20  | -.05  |
| Extraversion      | -.11      | .17 | -1.85 | .066 | -.67  | .02   |
| Agreeableness     | .17       | .22 | 3.01  | .003 | .23   | 1.10  |
| Conscientiousness | -.05      | .20 | -.92  | .357 | -.58  | .21   |
| Emo. Stability    | -.49      | .19 | -8.02 | .000 | -1.88 | -1.14 |
| Openness          | .08       | .20 | 1.39  | .165 | -.12  | .68   |
| Age               | -.14      | .02 | -2.68 | .008 | -.07  | -.01  |
| Sex               | .04       | .45 | .81   | .418 | -.52  | 1.25  |

c) Creativity, Positive affect, Stress→COVID-19 Experience

|                   | St.Coeff. | se  | t     | p    | LLCI  | ULCI |
|-------------------|-----------|-----|-------|------|-------|------|
| Creativity        | .03       | .82 | .31   | .756 | -1.36 | 1.86 |
| Positive affect   | .12       | .08 | 1.44  | .151 | -.04  | .29  |
| Stress            | -.25      | .14 | -3.17 | .002 | -.71  | -.17 |
| Extraversion      | -.11      | .38 | -1.58 | .116 | -1.33 | .15  |
| Agreeableness     | -.16      | .48 | -2.27 | .024 | -2.04 | -.15 |
| Conscientiousness | -.07      | .43 | -1.01 | .312 | -1.28 | .41  |
| Emo. stability    | .01       | .45 | .15   | .877 | -.82  | .96  |
| Openness          | -.07      | .43 | -.93  | .356 | -1.25 | .45  |
| Age               | -.03      | .03 | -.45  | .655 | -.08  | .05  |
| Sex               | .01       | .96 | .21   | .833 | -1.68 | 2.08 |

d) Indirect effects results

|                                                       | Effect | BootSE | BootLLCI | BootULCI |
|-------------------------------------------------------|--------|--------|----------|----------|
| Creativity->Positive affect->COVID-experience         | .55    | .43    | -.24     | 1.47     |
| Creativity->Stress->COVID-experience                  | -.05   | .20    | -.42     | .37      |
| Creativity->Positive affect->Stress->COVID-experience | .25    | .12    | .04      | .52      |
